# Supplementary material
Source: PubMed Central journal article supplement (PMC5438284)
Supplement: NIHMS831218-supplement-2.pdf [file NIHMS831218-supplement-2.pdf]

## Supplemental Materials

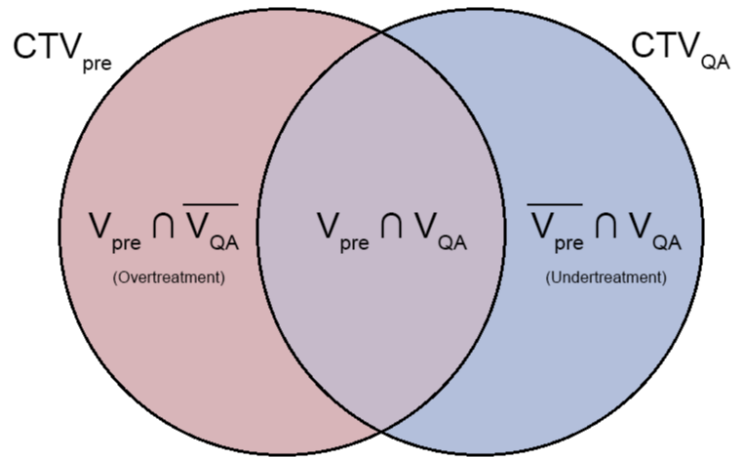

**Figure S1:**

The Dice Similarity Coefficient (DSC) is a volume overlap metric widely used in image segmentation to evaluate differences between two contours. DSC values range from 0 (no overlap) to 1 (perfect agreement). When comparing tumor and target volumes, the False Negative Dice (FND) and the False Positive Dice (FPD) can be used as surrogates to assess potential near misses and overtreatment in radiation oncology, respectively. For the FND and FPD, values range from 0 (perfect agreement) to 2 (complete miss). This figure illustrates these metrics in the context of our study. The region of interest (ROI) in red represents the CTV contours prior to the QA clinic, whereas the ROI in blue represents the post QA CTV contours.

Supplementary Table 1. Classification of quantitative changes by metric

| Trivial         | Minor                  | Major        |
|-----------------|------------------------|--------------|
| $DSC \geq 0.95$ | $0.95 > DSC \geq 0.80$ | $DSC < 0.80$ |
| $FND \leq 0.05$ | $0.05 < FND \leq 0.20$ | $FND > 0.20$ |
| $FPD \leq 0.05$ | $0.05 < FPD \leq 0.20$ | $FPD > 0.20$ |

Note, DSC – Dice Similarity Coefficient, FND – False Negative Dice, FPD – False Positive Dice
